# Supplementary material
Source: PubMed Central journal article supplement (PMC7191177)
Supplement: ajtr0012-1275-f7.pdf [file ajtr0012-1275-f7.pdf]

## ENO1 expression in ovarian cancer cells

**Supplementary Table 1.** List of the 147 proteins detected by proteomics in A2780 and A2780CP20 cells

| UniProtKB | Protein Symbol | Protein Name                                                   | Gene Name | Location                                                                                      | Function                                                                                     |
|-----------|----------------|----------------------------------------------------------------|-----------|-----------------------------------------------------------------------------------------------|----------------------------------------------------------------------------------------------|
| P62258    | 1433E          | 14-3-3 protein epsilon                                         | YWHAE     | Nucleus, Cytoplasm                                                                            | Host-virus Interaction                                                                       |
| P01889    | 1B07           | HLA class I histocompatibility antigen, B-7 alpha chain        | HLA-B     | Membrane, MCH I                                                                               | Host-virus Interaction, Immunity                                                             |
| P28223    | 5HT2A          | 5-hydroxytryptamine receptor 2A                                | HTR2A     | Plasma Membrane                                                                               | G-protein Coupled Receptor, Host Cell Receptor for Virus Entry, Receptor, Transducer         |
| P52209    | 6PGD           | 6-phosphogluconate dehydrogenase, decarboxylating              | PGD       | Cytoplasm                                                                                     | Oxidoreductase                                                                               |
| P29274    | AA2AR          | Adenosine receptor A2a                                         | ADORA2A   | Cell Membrane, Membrane                                                                       | G-Protein Coupled Receptor, Receptor, Transducer                                             |
| Q9UBJ2    | ABCD2          | ATP-binding cassette sub-family D member 2                     | ABCD2     | Membrane, Peroxisome                                                                          | ATPase activity, Transport                                                                   |
| P49753    | ACOT2          | Acyl-coenzyme A thioesterase 2, mitochondrial                  | ACOT2     | Mitochondrion                                                                                 | Hydrolase, Serine Esterase                                                                   |
| P60709    | ACTB           | Actin, cytoplasmic 1                                           | ACTB      | Cytoplasm, Cytoskeleton, Nucleus                                                              | Motility                                                                                     |
| P68133    | ACTS           | Actin, alpha skeletal muscle                                   | ACTA1     | Cytoplasm, Cytoskeleton                                                                       | Muscle Protein                                                                               |
| Q9P0K1    | ADA22          | Disintegrin and metalloproteinase domain-containing protein 22 | ADAM22    | Cell Membrane, Cell Projection, Membrane                                                      | Receptor                                                                                     |
| Q16186    | ADRM1          | Proteasomal ubiquitin receptor ADRM1                           | ADRM1     | Cytoplasm, Nucleus, Proteasome                                                                | Protein regulation                                                                           |
| Q02952    | AKA12          | A-kinase anchor protein 12                                     | AKAP12    | Cytoplasm, Cytoskeleton, Membrane                                                             | Anchoring Protein                                                                            |
| P31749    | AKT1           | RAC-alpha serine/threonine-protein kinase                      | AKT1      | Cell Membrane, Cytoplasm, Membrane, Nucleus                                                   | Developmental Protein, Kinase, Serine/Threonine-protein Kinase, Transferase                  |
| P49419    | AL7A1          | Alpha-aminoadipic semialdehyde dehydrogenase                   | ALDH7A1   | Cytoplasm, Mitochondrion, Nucleus                                                             | Oxidoreductase                                                                               |
| P04075    | ALDOA          | Fructose-bisphosphate aldolase A                               | ALDOA     | Cytoplasm                                                                                     | Lyase                                                                                        |
| Q9GZV1    | ANKR2          | Ankyrin repeat domain-containing protein 2                     | ANKRD2    | Cytoplasm, Nucleus                                                                            | Transcription Regulator                                                                      |
| P08243    | ASNS           | Asparagine synthetase [glutamine-hydrolyzing]                  | ASNS      | Cytosol                                                                                       | Ligase                                                                                       |
| P25705    | ATPA           | ATP synthase subunit alpha, mitochondrial                      | ATP5F1A   | Cell Membrane, CF(1), Membrane, Mitochondrion, Mitochondrion Inner Membrane                   | ATP Synthesis, Hydrogen Ion Transport, Ion transport, Transporter                            |
| UniProtKB | Protein Symbol | Protein Name                                                   | Gene Name | Location                                                                                      | Function                                                                                     |
| O00154    | BACH           | Cytosolic acyl coenzyme A thioester hydrolase                  | ACOT7     | Mitochondrion, Cytoplasm                                                                      | Hydrolase, Serine Esterase                                                                   |
| O75531    | BAF            | Barrier-to-autointegration factor                              | BANF1     | Chromosome, Cytoplasm, Nucleus                                                                | DNA-binding                                                                                  |
| Q13112    | CAF1B          | Chromatin assembly factor 1 subunit B                          | CHAF1B    | Nucleus, Cytoplasm                                                                            | Cell Cycle, DNA Damage, DNA Repair, DNA Replication, Transcription, Transcription Regulation |
| Q01518    | CAP1           | Adenylyl cyclase-associated protein 1                          | CAP1      | Cell Membrane, Membrane                                                                       | Actin-Binding                                                                                |
| P49662    | CASP4          | Caspase-4                                                      | CASP4     | Cytoplasm, Endoplasmic Reticulum, Inflammasome, Membrane, Mitochondrion, Extracellular Region | Hydrolase, Protease, Thiol Protease                                                          |
| P09668    | CATH           | Pro-cathepsin H                                                | CTSH      | Lysosome                                                                                      | Hydrolase, Protease, Thiol Protease                                                          |
| P52907    | CAZA1          | F-actin-capping protein subunit alpha-1                        | CAPZA1    | Cytoplasm, Cytoskeleton                                                                       | Actin Capping, Actin-binding                                                                 |
| P04234    | CD3D           | T-cell surface glycoprotein CD3 delta chain                    | CD3D      | Cell Membrane, Membrane                                                                       | Receptor                                                                                     |
| P53567    | CEBPG          | CCAAT/enhancer-binding protein gamma                           | CEBPG     | Nucleus                                                                                       | Activator, DNA-binding                                                                       |
| P68400    | CSK21          | Casein kinase II subunit alpha                                 | CSNK2A1   | Nucleus                                                                                       | Kinase, Serine/Threonine-protein Kinase, Transferase                                         |
| P04080    | CYTB           | Cystatin-B                                                     | CSTB      | Nucleus, Cytoplasm                                                                            | Protease Inhibitor, Thiol Protease Inhibitor                                                 |
| Q13561    | DCTN2          | Dynactin subunit 2                                             | DCTN2     | Cytoplasm, Cytoskeleton, Dynein, Membrane, Microtubule                                        | Protein binding                                                                              |

## ENO1 expression in ovarian cancer cells

|           |                |                                                                    |           |                                                                                                                                                                     |                                                                                                                   |
|-----------|----------------|--------------------------------------------------------------------|-----------|---------------------------------------------------------------------------------------------------------------------------------------------------------------------|-------------------------------------------------------------------------------------------------------------------|
| P35659    | DEK            | Protein DEK                                                        | DEK       | Nucleus                                                                                                                                                             | Chromatin Regulator, DNA-binding                                                                                  |
| P00367    | DHE3           | Glutamate dehydrogenase 1, mitochondrial                           | GLUD1     | Mitochondrion                                                                                                                                                       | Oxidoreductase                                                                                                    |
| P78352    | DLG4           | Disks large homolog 4                                              | DLG4      | Cell junction, Cell membrane, Cell projection, Cytoplasm, Membrane, Postsynaptic Cell Membrane, Synapse                                                             | Receptor Signaling                                                                                                |
| P30046    | DOPD           | D-dopachrome decarboxylase                                         | DDT       | Cytoplasm                                                                                                                                                           | Lyase                                                                                                             |
| UniProtKB | Protein Symbol | Protein Name                                                       | Gene Name | Location                                                                                                                                                            | Function                                                                                                          |
| P50570    | DYN2           | Dynamamin-2                                                        | DNM2      | Cell Junction, Cell Membrane, Cell Projection, Coated Pit, Cytoplasm, Cytoplasmic vesicle, Cytoskeleton, Membrane, Microtubule, Postsynaptic Cell Membrane, Synapse | Hydrolase, Motor Protein                                                                                          |
| P49411    | EFTU           | Elongation factor Tu, mitochondrial                                | TUFM      | Mitochondrion                                                                                                                                                       | Elongation factor                                                                                                 |
| P00533    | EGFR           | Epidermal growth factor receptor                                   | EGFR      | Golgi Apparatus, Plasma Membrane, Nucleus, Endosome, Endoplasmic Reticulum, Extracellular Region                                                                    | Developmental Protein, Host Cell Receptor for Virus Entry, Kinase, Receptor, Transferase, Tyrosine-protein Kinase |
| Q8N8S7    | ENAH           | Protein enabled homolog                                            | ENAH      | Cell Junction, Cell Projection, Cytoplasm, Cytoskeleton, Synapse                                                                                                    | Actin-binding                                                                                                     |
| P06733    | ENOA           | Alpha-enolase                                                      | ENO1      | Cell membrane, Cytoplasm, Membrane, Nucleus                                                                                                                         | DNA-binding, Lyase, Repressor                                                                                     |
| Q9H6S3    | ESSL2          | Epidermal growth factor receptor kinase substrate 8-like protein 2 | EPSL2     | Cell Projection, Cytoplasm                                                                                                                                          | Actin-binding                                                                                                     |
| Q14296    | FASTK          | Fas-activated serine/threonine kinase                              | FASTK     | Mitochondrion                                                                                                                                                       | Kinase, RNA-binding, Serine/Threonine-protein Kinase, Transferase                                                 |
| P07332    | FES            | Tyrosine-protein kinase Fes/Fps                                    | FES       | Cell Junction, Cell Membrane, Cytoplasm, Cytoplasmic Vesicle, Cytoskeleton, Golgi Apparatus, Membrane                                                               | Kinase, Transferase, Tyrosine-protein Kinase                                                                      |
| Q02790    | FKBP4          | Peptidyl-prolyl cis-trans isomerase FKBP4                          | FKBP4     | Cell Projection, Cytoplasm, Cytoskeleton, Microtubule, Mitochondrion, Nucleus                                                                                       | Chaperone, Isomerase, Rotamase                                                                                    |
| Q04446    | GLGB           | 1,4-alpha-glucan-branching enzyme                                  | GBE1      | Cytosol, Extracellular Region                                                                                                                                       | Glycosyltransferase, Transferase                                                                                  |
| P63096    | GNAI1          | Guanine nucleotide-binding protein G(i) subunit alpha-1            | GNAI1     | Cell Membrane, Cytoplasm, Cytoskeleton, Membrane, Nucleus                                                                                                           | Transducer                                                                                                        |
| P36969    | GPX4           | Phospholipid hydroperoxide glutathione peroxidase                  | GPX4      | Cytoplasm, Mitochondrion                                                                                                                                            | Developmental Protein, Oxidoreductase, Peroxidase                                                                 |
| Q16836    | HCDH           | Hydroxyacyl-Coenzyme A dehydrogenase, Mitochondrial                | HADH      | Mitochondrion                                                                                                                                                       | Oxidoreductase                                                                                                    |
| UniProtKB | Protein Symbol | Protein Name                                                       | Gene Name | Location                                                                                                                                                            | Function                                                                                                          |
| P51858    | HDGF           | Hepatoma-derived growth factor                                     | HDGF      | Cytoplasm, Nucleus                                                                                                                                                  | DNA-binding, Repressor, Growth factor, Heparin-binding                                                            |
| P02790    | HEMO           | Hemopexin                                                          | HPX       | Extracellular Region                                                                                                                                                | Host-virus Interaction, Transport                                                                                 |
| P04233    | HG2A           | HLA class II histocompatibility antigen gamma chain                | CD74      | Endosome, Lysosome, Golgi Apparatus, Endoplasmic Reticulum, Plasma Membrane                                                                                         | Chaperone                                                                                                         |
| Q16665    | HIF1A          | Hypoxia-inducible factor 1-alpha                                   | HIF1A     | Cytoplasm, Nucleus                                                                                                                                                  | Activator, DNA-binding                                                                                            |
| O75330    | HMMR           | Hyaluronan mediated motility receptor                              | HMMR      | Cytoplasm                                                                                                                                                           | Hyaluronic Acid                                                                                                   |
| P07910    | HNRPC          | Heterogeneous nuclear ribonucleoprotein C1/C2                      | HNRNPC    | Nucleus, Spliceosome                                                                                                                                                | Ribonucleoprotein, RNA-binding                                                                                    |
| Q00613    | HSF1           | Heat shock factor protein 1                                        | HSF1      | Nucleus, Cytoskeleton                                                                                                                                               | Activator, DNA binding                                                                                            |
| Q03933    | HSF2           | Heat shock factor protein 2                                        | HSF2      | Nucleus, Cytoplasm                                                                                                                                                  | Activator, DNA-binding                                                                                            |
| P34932    | HSP74          | Heat shock 70 kDa protein 4                                        | HSPA4     | Cytoplasm                                                                                                                                                           | Stress Response                                                                                                   |

## ENO1 expression in ovarian cancer cells

|                   |                 |                                                                   |                   |                                                                    |                                                                                         |
|-------------------|-----------------|-------------------------------------------------------------------|-------------------|--------------------------------------------------------------------|-----------------------------------------------------------------------------------------|
| Q92839            | HYAS1           | Hyaluronan synthase 1                                             | HAS1              | Membrane                                                           | Glycosyltransferase, Transferase                                                        |
| Q92819            | HYAS2           | Hyaluronan synthase 2                                             | HAS2              | Membrane                                                           | Glycosyltransferase, Transferase                                                        |
| P05198            | IF2A            | Eukaryotic translation initiation factor 2 subunit 1              | EIF2S1            | Cytoplasm                                                          | Initiation Factor, RNA-binding                                                          |
| P35225            | IL13            | Interleukin 13                                                    | IL13              | Extracellular Region                                               | Cytokine                                                                                |
| P05112            | IL4             | Interleukin-4                                                     | IL4               | Extracellular Region                                               | Cytokine, Growth Factor                                                                 |
| Q13418            | ILK             | Integrin-linked protein kinase                                    | ILK               | Cell Junction, Cell Membrane, Cell Projection, Cytoplasm, Membrane | Kinase, Serine/Threonine-protein Kinase, Transferase                                    |
| Q9H0C8            | ILKAP           | Integrin-linked kinase-associated serine/threonine phosphatase 2C | ILKAP             | Cytoplasm                                                          | Hydrolase, Protein Phosphatase                                                          |
| P12268            | IMDH2           | Inosine-5'-monophosphate dehydrogenase 2                          | IMPDH2            | Nucleus, Cytoplasm                                                 | DNA-binding, Oxidoreductase, RNA-binding                                                |
| P41236            | IPP2            | Protein phosphatase inhibitor 2                                   | PPP1R2            | Nucleus, Cytosol                                                   | Protein Phosphatase Inhibitor                                                           |
| Q9Y624            | JAM1            | Junctional adhesion molecule A                                    | F11R              | Plasma Membrane                                                    | Host Cell Receptor for Virus Entry, Receptor                                            |
| P56470            | LEG4            | Galectin-4                                                        | LGALS4            | Extracellular Region, Cytosol, Plasma Membrane                     | Lectin                                                                                  |
| P02545            | LMNA            | Prelamin-A/C                                                      | LMNA              | Intermediate Filament, Nucleus                                     | Nucleus dynamics                                                                        |
| Q02779            | M3K10           | Mitogen-activated protein kinase kinase kinase 10                 | MAP3K10           | Cytoplasm                                                          | Kinase, Serine/Threonine-protein Kinase, Transferase                                    |
| UniProtKB         | Protein Symbol  | Protein Name                                                      | Gene Name         | Location                                                           | Function                                                                                |
| Q99558            | M3K14           | Mitogen-activated protein kinase kinase kinase 14                 | MAP3K14           | Cytoplasm                                                          | Kinase, Serine/Threonine-protein kinase, Transferase                                    |
| Q9Y2U5            | M3K2            | Mitogen-activated protein kinase kinase kinase 2                  | MAP3K2            | Nucleus, Cytoplasm                                                 | Kinase, Serine/Threonine-protein Kinase, Transferase                                    |
| P40925            | MDHC            | Malate dehydrogenase, cytoplasmic                                 | MDH1              | Cytoplasm                                                          | Oxidoreductase                                                                          |
| P28482            | MK01            | Mitogen-activated protein kinase 1                                | MAPK1             | Nucleus, Cytoskeleton, Cytoplasm, Membrane                         | DNA-binding, Kinase, Repressor, Serine/Threonine-protein Kinase, Transferase            |
| P27361            | MK03            | Mitogen-activated protein kinase 3                                | MAPK3             | Cytoplasm, Membrane, Nucleus                                       | Kinase, Serine/Threonine-protein kinase, Transferase                                    |
| P01106            | MYC             | Myc proto-oncogene protein                                        | MYC               | Nucleus                                                            | Activator, DNA-binding                                                                  |
| P04198            | MYCN            | N-myc proto-oncogene protein                                      | MYCN              | Nucleus                                                            | Activator, DNA-binding                                                                  |
| Q15746            | MYLK            | Myosin light chain kinase, smooth muscle                          | MYLK              | Cytoskeleton, Cell Projection, Cytoplasm                           | Actin-binding, Calmodulin-binding, Kinase, Serine/Threonine-protein Kinase, Transferase |
| P19878            | NCF2            | Neutrophil cytosol factor 2                                       | NCF2              | Cytoplasm                                                          | Electron transfer                                                                       |
| Q15080            | NCF4            | Neutrophil cytosol factor 4                                       | NCF4              | Endosome, Cytoplasm, Membrane                                      | Lipid-binding                                                                           |
| O43639            | NCK2            | Cytoplasmic protein NCK2                                          | NCK2              | Endoplasmic Reticulum, Cytoplasm                                   | Translation Regulation                                                                  |
| P22392            | NDKB            | Nucleoside diphosphate kinase B                                   | NME2              | Cell Projection, Cytoplasm, Nucleus                                | Activator, DNA-binding, Kinase, Transferase                                             |
| Q15843            | NEDD8           | NEDD8                                                             | NEDD8             | Nucleus                                                            | Ubl Conjugation Pathway                                                                 |
| Q16236            | NF2L2           | Nuclear factor erythroid 2-related factor 2                       | NFE2L2            | Nucleus, Cytoplasm                                                 | Activator, DNA-binding                                                                  |
| P19838            | NFKB1           | Nuclear factor NF-kappa-B p105 subunit                            | NFKB1             | Nucleus, Cytoplasm                                                 | Activator, DNA-binding                                                                  |
| Q9Y5S8            | NOX1            | NADPH oxidase 1                                                   | NOX1              | Cell Junction, Cell Membrane, Cell Projection, Membrane            | Ion channel, Oxidoreductase, Voltage-gated Channel                                      |
| O14786            | NRP1            | Neuropilin-1                                                      | NRP1              | Cell Membrane, Extracellular Region, Membrane                      | Developmental Protein, Heparin-binding, Receptor                                        |
| P49757            | NUMB            | Protein numb homolog                                              | NUMB              | Membrane                                                           | Developmental Protein                                                                   |
| Q9POS3/<br>Q53FV1 | ORML1/<br>ORML2 | ORM1-like protein 1/ORM1-like protein 2                           | ORMDL1/<br>ORMDL2 | Endoplasmic Reticulum, Membrane                                    | Metabolism                                                                              |

## ENO1 expression in ovarian cancer cells

|           |                |                                                                                |           |                                                          |                                                                            |
|-----------|----------------|--------------------------------------------------------------------------------|-----------|----------------------------------------------------------|----------------------------------------------------------------------------|
| P04637    | P53            | Cellular tumor antigen p53                                                     | TP53      | Nucleus, Cytoplasm, Endoplasmic Reticulum, Mitochondrion | Activator, DNA-binding, Repressor                                          |
| UniProtKB | Protein Symbol | Protein Name                                                                   | Gene Name | Location                                                 | Function                                                                   |
| Q8WX93    | PALLD          | Palladin                                                                       | PALLD     | Cytoskeleton, Cell Projection, Cell Junction, Cytoplasm  | Actin-binding                                                              |
| Q96R10    | PAR4           | Proteinase-activated receptor 4                                                | F2RL3     | Cell Membrane                                            | G-protein Coupled Receptor, Receptor, Transducer                           |
| P23760    | PAX3           | Paired box protein Pax-3                                                       | PAX3      | Nucleus                                                  | Developmental Protein, DNA-binding                                         |
| Q01064    | PDE1B          | Calcium/calmodulin-dependent 3',5'-cyclic nucleotide phosphodiesterase 1B      | PDE1B     | Cytoplasm                                                | Calmodulin-binding, Hydrolase                                              |
| Q8IZL8    | PELP1          | Proline-, glutamic acid- and leucine-rich protein 1                            | PELP1     | Nucleus, Cytoplasm                                       | Activator, Repressor                                                       |
| P40855    | PEX19          | Peroxisomal biogenesis factor 19                                               | PEX19     | Peroxisome, Cytoplasm, Membrane                          | Peroxisome Biogenesis                                                      |
| P28328    | PEX2           | Peroxisome biogenesis factor 2                                                 | PEX2      | Peroxisome, Membrane                                     | Peroxisome Biogenesis                                                      |
| Q96HS1    | PGAM5          | Serine/threonine-protein phosphatase PGAM5, mitochondrial                      | PGAM5     | Mitochondrion, Membrane, Mitochondrion Outer Membrane    | Hydrolase                                                                  |
| Q9Y3A3    | PHOCN          | MOB-like protein phocein                                                       | MOB4      | Cytoplasm, Golgi Apparatus, Membrane                     | Transport                                                                  |
| P42336    | PK3CA          | Phosphatidylinositol 4,5-bisphosphate 3-kinase catalytic subunit alpha isoform | PIK3CA    | Cytosol, Plasma Membrane                                 | Kinase, Serine/Threonine-protein Kinase, Transferase                       |
| O14939    | PLD2           | Phospholipase D2                                                               | PLD2      | Membrane                                                 | Hydrolase                                                                  |
| Q15435    | PP1R7          | Protein phosphatase 1 regulatory subunit 7                                     | PPP1R7    | Nucleus                                                  | Regulator enzyme                                                           |
| Q07869    | PPARA          | Peroxisome proliferator-activated receptor alpha                               | PPARA     | Nucleus                                                  | Activator, DNA-binding, Receptor                                           |
| P53041    | PPP5           | Serine/threonine-protein phosphatase 5                                         | PPP5C     | Cell Membrane, Nucleus, Cytoplasm, Membrane, Amyloid     | Hydrolase, Protein Phosphatase                                             |
| P30041    | PRDX6          | Peroxiredoxin-6                                                                | PRDX6     | Lysosome, Cytoplasm                                      | Antioxidant, Hydrolase, Multifunctional Enzyme, Oxidoreductase, Peroxidase |
| P07737    | PROF1          | Profilin-1                                                                     | PFN1      | Cytoskeleton, Cytoplasm                                  | Actin-binding                                                              |
| P43686    | PRSG6          | 26S proteasome regulatory subunit 6B                                           | PSMC4     | Nucleus, Cytoplasm, Proteasome                           | ATP-binding, Nucleotide-binding                                            |
| Q9UNM6    | PSD13          | 26S proteasome non-ATPase regulatory subunit 13                                | PSMD13    | Cytosol, Extracellular Region, Nucleus                   | structural molecule activity                                               |
| Q06203    | PUR1           | Amidophosphoribosyltransferase                                                 | PPAT      | Cytosol                                                  | Allosteric Enzyme, Glycosyltransferase Transferase                         |
| UniProtKB | Protein Symbol | Protein Name                                                                   | Gene Name | Location                                                 | Function                                                                   |
| P22102    | PUR2           | Trifunctional purine biosynthetic protein adenosine-3                          | GART      | Cytosol, Extracellular Region                            | Ligase, Multifunctional Enzyme, Transferase                                |
| O15067    | PUR4           | Phosphoribosylformylglycinamide synthase                                       | PFAS      | Cytoplasm                                                | Ligase                                                                     |
| P22234    | PUR6           | Multifunctional protein ADE2                                                   | PAICS     | Cytosol, Extracellular Region, Cytoplasm, Membrane       | Multifunctional Enzyme, Lyase, Ligase, Decarboxylase                       |
| P30566    | PUR8           | Adenylosuccinate lyase                                                         | ADSL      | Cytosol                                                  | Lyase                                                                      |
| P31939    | PUR9           | Bifunctional purine biosynthesis protein PURH                                  | ATIC      | Cytosol, Plasma Membrane, Extracellular Region, Membrane | Hydrolase, Multifunctional Enzyme, Transferase                             |
| P15153    | RAC2           | Ras-related C3 botulinum toxin substrate 2                                     | RAC2      | Cytoplasm                                                | GTP-binding, Nucleotide-binding                                            |
| O75628    | REM1           | GTP-binding protein REM 1                                                      | REM1      | Plasma Membrane                                          | Calmodulin-binding                                                         |
| P61353    | RL27           | 60S ribosomal protein L27                                                      | RPL27     | Endoplasmic Reticulum, Cytoplasm                         | Ribonucleoprotein, Ribosomal Protein                                       |
| Q9H2W6    | RM46           | 39S ribosomal protein L46, mitochondrial                                       | MRPL46    | Mitochondrion                                            | Ribonucleoprotein, Ribosomal Protein                                       |
| P62875    | RPAB5          | DNA-directed RNA polymerases I, II, and III subunit RPABC5                     | POLR2L    | Nucleus, DNA-directed RNA Polymerase                     | Transcription                                                              |

## ENO1 expression in ovarian cancer cells

|                   |                |                                                                                                |                 |                                                                  |                                                                                                    |
|-------------------|----------------|------------------------------------------------------------------------------------------------|-----------------|------------------------------------------------------------------|----------------------------------------------------------------------------------------------------|
| Q9Y3I0            | RTCB           | tRNA-splicing ligase RtcB homolog                                                              | RTCB            | Nucleus, Cytoplasm                                               | Ligase                                                                                             |
| Q9NVA2            | SEP11          | Septin-11                                                                                      | SEPT11          | Cytoplasm, Cytoskeleton, Synapse, Cell Junction, Cell Projection | Cell Cycle, Cell Division                                                                          |
| Q99719            | SEPT5          | Septin-5                                                                                       | SEPT5           | Cytoplasm, Cytoskeleton                                          | Cell Cycle, Cell Division                                                                          |
| Q9UIU6            | SIX4           | Homeobox protein SIX4                                                                          | SIX4            | Nucleus, Cytoplasm                                               | Developmental Protein, DNA-binding                                                                 |
| Q96GM5            | SMRD1          | SWI/SNF-related, matrix-associated actin-dependent regulator of chromatin subfamily D member 1 | SMARCD1         | Nucleus                                                          | Chromatin regulator                                                                                |
| Q9HAU4            | SMUF2          | E3 ubiquitin-protein ligase SMURF2                                                             | SMURF2          | Nucleus, Membrane, Cell Membrane, Cytoplasm                      | Transferase                                                                                        |
| P54920            | SNAA           | Alpha-soluble NSF attachment protein                                                           | NAPA            | Cell Membrane, Membrane                                          | ER-Golgi Transport, Protein Transport, Transport                                                   |
| P36952            | SPB5           | Serpin B5                                                                                      | SER-PINB5       | Extracellular Region                                             | Serine-type endopeptidase inhibitor activity                                                       |
| P19623            | SPEE           | Spermidine synthase                                                                            | SRM             | Cytosol                                                          | Transferase                                                                                        |
| O43295            | SRGP3          | SLIT-ROBO Rho GTPase-activating protein 3                                                      | SRGAP3          | Cytosol                                                          | GTPase-activation                                                                                  |
| UniProtKB         | Protein Symbol | Protein Name                                                                                   | Gene Name       | Location                                                         | Function                                                                                           |
| P31948            | STIP1          | Stress-induced-phosphoprotein 1                                                                | STIP1           | Cytoplasm, Nucleus                                               | Mediates the association of the molecular chaperones                                               |
| Q9Y3F4            | STRAP          | Serine/threonine kinase receptor-associated protein                                            | STRAP           | Nucleus, Cytoplasm                                               | mRNA Processing, mRNA Splicing                                                                     |
| P17600            | SYN1           | Synapsin-1                                                                                     | SYN1            | Golgi Apparatus, Synapse, Cell Junction                          | Actin-binding                                                                                      |
| P54577            | SYC            | Tyrosine-tRNA ligase, cytoplasmic                                                              | YARS            | Cytoplasm                                                        | Aminoacyl-tRNA Synthetase, Ligase, RNA-binding, tRNA-binding                                       |
| Q9H4B7            | TBB1           | Tubulin beta-1 chain                                                                           | TUBB1           | Cytoplasm, Cytoskeleton, Microtubule                             | GTP-binding, Nucleotide-binding                                                                    |
| Q99832            | TCPH           | T-complex protein 1 subunit eta                                                                | CCT7            | Cytoplasm                                                        | Chaperone                                                                                          |
| P40227            | TCPZ           | T-complex protein 1 subunit zeta                                                               | CCT6A           | Cytoplasm                                                        | Chaperone                                                                                          |
| Q59G49            | TIA1           | TIA1 cytotoxic granule-associated RNA-binding protein-like 1                                   | N/A             | Nucleus                                                          | RNA-binding                                                                                        |
| Q01085            | TIAR           | Nucleolysin TIAR                                                                               | TIAL1           | Nucleus, Cytoplasm                                               | RNA-binding                                                                                        |
| P16035            | TIMP2          | Metalloproteinase inhibitor 2                                                                  | TIMP2           | Extracellular Region                                             | Metalloenzyme Inhibitor, Metalloprotease Inhibitor, Protease Inhibitor                             |
| Q8WZ42            | TITIN          | Titin                                                                                          | TTN             | Cytoplasm, Nucleus                                               | Calmodulin-binding, Kinase, Serine/Threonine-protein Kinase, Transferase                           |
| P01375            | TNFA           | Tumor necrosis factor                                                                          | TNF             | Cell Membrane, Membrane, Extracellular Region                    | Cytokine                                                                                           |
| P07477/<br>P35030 | TRY1/<br>TRY3  | Trypsin-1/Trypsin-3                                                                            | PRSS1/<br>PRSS3 | Extracellular Region                                             | Hydrolase, Protease, Serine Protease                                                               |
| Q99816            | TS101          | Tumor susceptibility gene 101 protein                                                          | TSG101          | Cytoplasm, Cytoskeleton, Endosome, Membrane, Nucleus             | Cell Cycle, Cell Division, Growth Regulation, Host-virus Interaction, Protein Transport, Transport |
| Q15672            | TWST1          | Twist-related protein 1                                                                        | TWIST1          | Nucleus                                                          | Activator, Developmental Protein, DNA-binding, Repressor                                           |
| Q9UK80            | UBP21          | Ubiquitin carboxyl-terminal hydrolase 21                                                       | USP21           | Nucleus, Cytoplasm                                               | Activator, Chromatin Regulator, Hydrolase, Protease, Thiol Protease                                |
| P09936            | UCHL1          | Ubiquitin carboxyl-terminal hydrolase isozyme L1                                               | UCHL1           | Endoplasmic Reticulum, Membrane, Cytoplasm                       | Hydrolase, Ligase, Protease, Thiol Protease                                                        |
| O60701            | UGDH           | UDP-glucose 6-dehydrogenase                                                                    | UGDH            | Cytosol, Extracellular Region, Nucleus                           | Allosteric Enzyme, Oxidoreductase                                                                  |
| P67809            | YBOX1          | Nuclease-sensitive element-binding protein 1                                                   | YBX1            | Nucleus, Cytoplasm, Extracellular Region                         | Activator, DNA-binding, Mitogen, Repressor, RNA-binding                                            |

## ENO1 expression in ovarian cancer cells

**Supplementary Table 2.** List of the 48 proteins differentially abundant in A280 vs. A2780CP20 cells

| Gene Name | Protein Name                                                      | Ratio (A2780CP20/A2780) |
|-----------|-------------------------------------------------------------------|-------------------------|
| ACOT7     | Cytosolic acyl coenzyme A thioester hydrolase                     | -1.390                  |
| ALDH7A1   | Alpha-aminoadipic semialdehyde dehydrogenase                      | 2.740                   |
| ALDOA     | Fructose-bisphosphate aldose A                                    | 2.690                   |
| ASNS      | Asparagine synthetase [glutamine-hydrolyzing]                     | -1.920                  |
| ATIC      | Bifunctional purine biosynthesis protein PURH                     | -1.350                  |
| ATP5F1A   | ATP synthase subunit alpha, mitochondrial                         | 1.610                   |
| BANF1     | Barrier-to-autointegration factor                                 | 2.680                   |
| CAP1      | Adenylyl cyclase-associated protein 1                             | -1.660                  |
| CAPZA1    | F-actin-capping protein subunit alpha-1                           | -1.64                   |
| CAZA1     | F-actin-capping protein subunit alpha-1                           | -1.640                  |
| CCT6A     | T-complex protein 1 subunit zeta                                  | -1.120                  |
| CCT7      | T-complex protein 1 subunit eta                                   | 2.260                   |
| CSTB      | Cystatin-B                                                        | -2.670                  |
| DDT       | D-dopachrome decarboxylase                                        | 5.070                   |
| EIF2S1    | Eukaryotic translation inhibition factor 2 subunit 1              | -1.460                  |
| ENAH      | Protein enabled homolog                                           | -1.430                  |
| ENO1      | Alpha-enolase                                                     | -2.690                  |
| GLUD1     | Glutamate dehydrogenase 1, mitochondrial                          | 2.380                   |
| HDGF      | Hepatoma-derived growth factor                                    | -1.360                  |
| HNRNPC    | Heterogeneous nuclear ribonucleoprotein C1/C2                     | -1.420                  |
| ILKAP     | Integrin-linked kinase-associated serine/threonine phosphatase 2C | -2.520                  |
| IMPDH2    | Inosine-5'-monophosphate dehydrogenase 2                          | -1.510                  |
| LMNA      | Prelamin-A/C                                                      | -1.600                  |
| MDH1      | Malate dehydrogenase, cytoplasmic                                 | -1.260                  |
| MRPL46    | 39S ribosomal protein L46, mitochondrial                          | 1.620                   |
| NAPA      | Alpha-soluble NSF attachment protein                              | -1.540                  |
| PAICS     | Multifunctional protein ADE2                                      | -1.880                  |
| PEX19     | Peroxisomal biogenesis factor 19                                  | -1.440                  |
| PFN1      | Profilin-1                                                        | -1.540                  |
| PGD       | 6-phosphogluconate dehydrogenase, decarboxylating                 | -2.010                  |
| PPP1R7    | Protein phosphatase 1 regulatory subunit 7                        | -1.470                  |
| PRDX6     | Peroxiredoxin-6                                                   | 2.780                   |
| PSMD13    | 26S proteasome non-ATPase regulatory subunit 13                   | -1.430                  |
| RPL27     | 60S ribosomal protein L27                                         | 4.340                   |
| RTCB      | tRNA-splicing ligase homolog                                      | 1.910                   |
| SEPT11    | Septin-11                                                         | -2.450                  |
| SRM       | Spermidine synthase                                               | -1.420                  |
| STIP1     | Stress-induced-phosphoprotein 1                                   | -2.250                  |
| STRAP     | serine/threonine kinase receptor associated protein               | -1.460                  |
| TIA1      | TIA1 cytotoxic granule-associated RNA-binding protein-like1       | -1.970                  |
| TRY3      | Trypsin-3                                                         | -1.460                  |
| TTN       | Titin                                                             | 2.460                   |
| TUFM      | Elongation factor Tu, mitochondrial                               | -1.290                  |
| UCHL1     | Ubiquitin carboxyl-terminal hydrolase 21                          | -1.570                  |
| UGDH      | UDP-glucose 6-dehydrogenase                                       | 1.690                   |
| YARS      | tyrosyl-tRNA synthetase                                           | -1.780                  |
| YBX1      | Nuclease-sensitive element-binding protein 1                      | -1.740                  |
| YWHAE     | 14-3-3 protein epsilon                                            | -1.730                  |

## ENO1 expression in ovarian cancer cells

**Supplementary Table 3.** Concentrations of cisplatin inhibiting 50% of cell viability. Incubation with cisplatin: 72-hr following by Alamar Blue assay

| Cell line | IC <sub>50</sub> cisplatin (μM) |
|-----------|---------------------------------|
| A2780     | 0.5-0.8                         |
| A2780CP20 | 20-30                           |
| A2780CIS  | 4.3                             |
| OV90      | 3.5                             |
| OV90CIS   | 9.9                             |
| OVCAR3    | 2.8                             |
| OVCAR3CIS | 12.6                            |

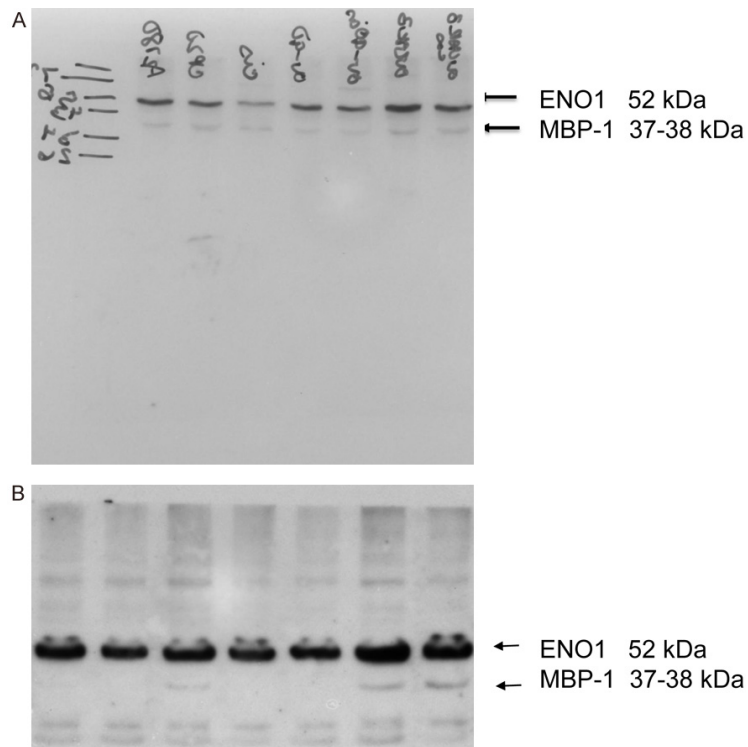

**Supplementary Figure 1.** Western blot images. A. Original Western blots showing the ENO1 and MBP-1 levels in the ovarian cancer cell panel. B. Western blot image showing the ENO1 and MBP-1 levels in the stable transfected clones. To observe a MBP-1 band we overexposed the X-ray film (30 minutes).

## ENO1 expression in ovarian cancer cells

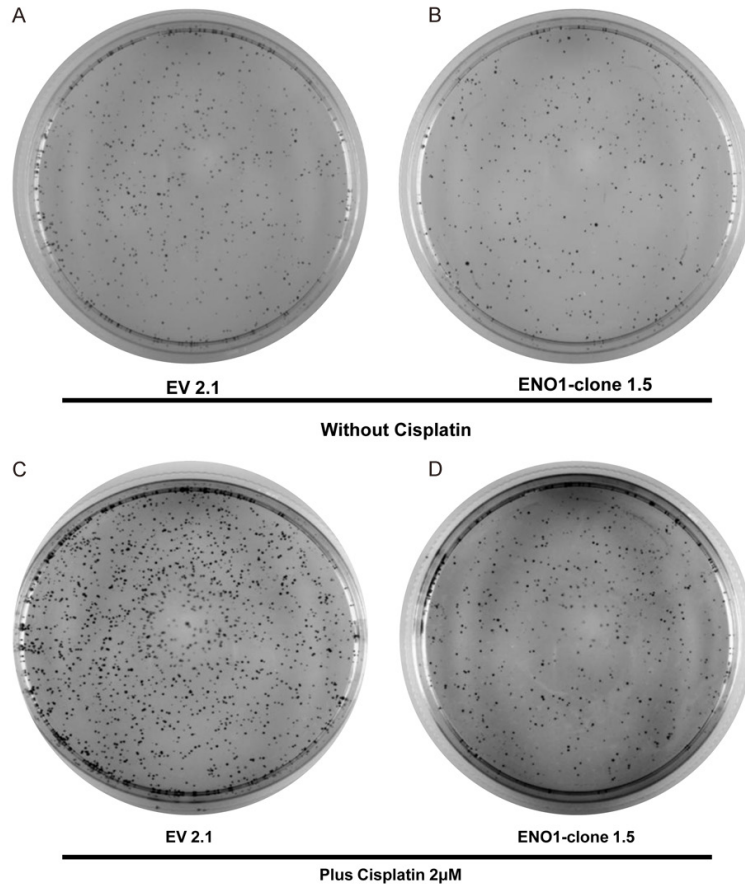

**Supplementary Figure 2.** Colony formation assays. Images of whole Petri dishes showed in **Figure 3C**. Experiments were performed as described in the legend of **Figure 3**.



## ENO1 expression in ovarian cancer cells

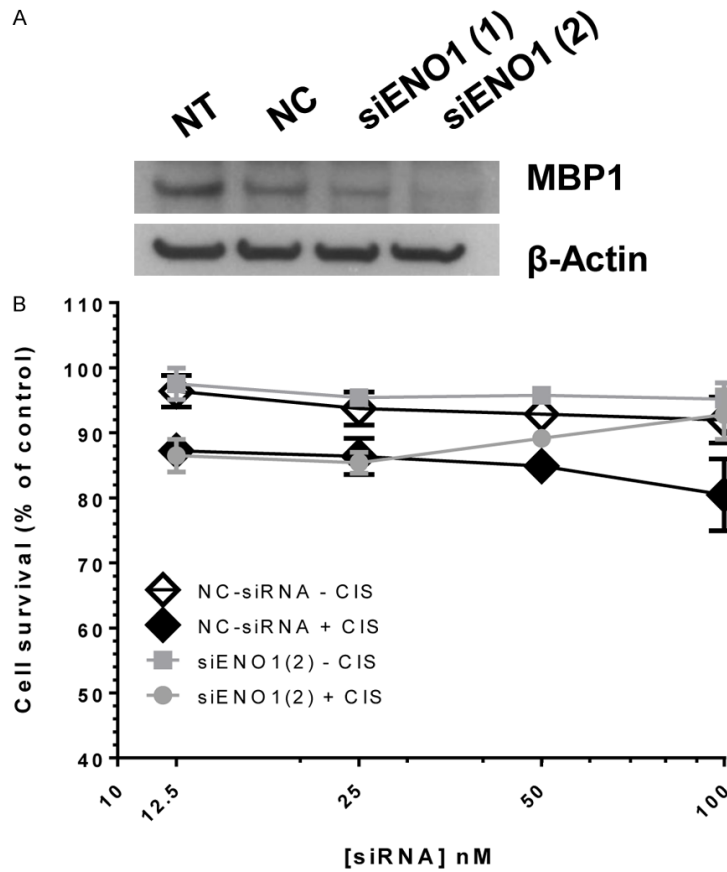

**Supplementary Figure 3.** In vitro effect of siRNA-mediated ENO1/MBP-1 silencing on cell viability. A. A2780 cells ( $3 \times 10^4$  cells/ml) were transiently transfected with siRNAs as described in the section of “Materials and Methods” section. The band in the Western blot correspond to MBP1 (MW: 37 kDa). The ENO1-siRNA(1) had not visible effects in the MBP1 levels. However the ENO1-siRNA(2) decreased the MBP1 levels as expected. B. A2780 cells ( $3 \times 10^4$  cells/ml) cells were plated in 96-wells and the next day cells were transfected with siRNAs as described in the legend of **Figure 3**. Twenty-four hours after siRNA transfection different doses of cisplatin were added to the cells. Forty-eight hours later cell viability was assessed as described in the “Materials and Methods” section. Averages  $\pm$  SEM are shown for three independent experiments. The siENO1(2) which target both ENO1 and MBP-1 did not have significant effects of the sensitivity of cells to cisplatin (CIS) treatment.
